# Supplementary material
Source: PubMed Central journal article supplement (PMC3677499)
Supplement: 1215935110_pnas.201215935SI.pdf [file 1215935110_pnas.201215935SI.pdf]

# Supporting Information

Plikus et al. 10.1073/pnas.1215935110

## SI Text

Movies S1, S2, S3, and S4 are time-lapse recordings from individually cultured *Period2<sup>Luc</sup>* vibrissa follicles show that circadian cycles of luminescence localize to several follicular areas, most prominently to follicular bulge and bulb. To aid visualization, the highest luminescence levels in Movies S2 and S4 were

converted to red color. Each movie starts with the bright-field image of microdissected vibrissa follicles at time point 0 of the experiment; 24-h cycles of actual experimental time are labeled on the right. At the beginning of the experiment, follicles A and D have telogen morphology, whereas follicles B, C, E, and F are in anagen.









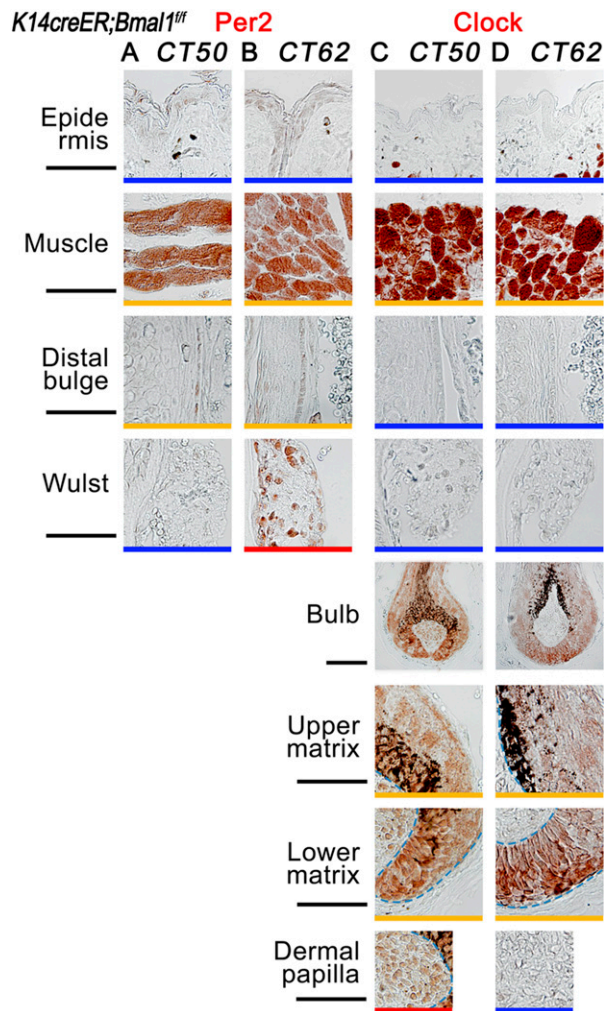

**Fig. S5.** Per2 and Clock expression loses circadian rhythmicity in epithelial compartment of induced *K14creER;Bmal1<sup>ff</sup>* mice. In *K14creER;Bmal1<sup>ff</sup>* hair follicles, both Per2 and Clock expressions become arrhythmic in epithelial but not in mesenchymal compartments. In *K14creER;Bmal1<sup>ff</sup>* anagen vibrissae, Per2 is nearly absent in the interfollicular epidermis and distal bulge but remains high in epithelial matrix at CT50 and CT62 (Fig. 2). Mesenchymal structures (dermal papilla and ringwulst) maintain normal cyclic Per2 expression, which peaks at CT62 (also see Fig. 2). Similarly, cyclic Clock expression is lost in all epithelial structures of the vibrissae follicle but not in dermal papilla, where it peaks at CT50 (C and D). The definition of color bars is the same as in Fig. S2.

| CT time, hrs                       | 48           | 50        | 52        | 54          | 56        | 58         | 60           | 62          | 64          | 66          | 68          | 70           | 72           | 74        | 76        | 78          | 80             | 82         | 84           | 86          | 88          | 90          | 92          | 96           | 98           | 100       | 102            | 104         | 106       |  |  |  |  |  |  |  |  |
|------------------------------------|--------------|-----------|-----------|-------------|-----------|------------|--------------|-------------|-------------|-------------|-------------|--------------|--------------|-----------|-----------|-------------|----------------|------------|--------------|-------------|-------------|-------------|-------------|--------------|--------------|-----------|----------------|-------------|-----------|--|--|--|--|--|--|--|--|
| Day/Night, hrs                     | Day, 0hrs    | Day, 2hrs | Day, 4hrs | Day, 6hrs   | Day, 8hrs | Day, 10hrs | Day, 12hrs   | Night, 2hrs | Night, 4hrs | Night, 6hrs | Night, 8hrs | Night, 10hrs | Night, 12hrs | Day, 2hrs | Day, 4hrs | Day, 6hrs   | Day, 8hrs      | Day, 10hrs | Day, 12hrs   | Night, 2hrs | Night, 4hrs | Night, 6hrs | Night, 8hrs | Night, 10hrs | Night, 12hrs | Day, 2hrs | Day, 4hrs      | Day, 6hrs   | Day, 8hrs |  |  |  |  |  |  |  |  |
| AM/PM time                         | 7am          | 9am       | 11am      | 1pm         | 3pm       | 5pm        | 7pm          | 9pm         | 11pm        | 1am         | 3am         | 5am          | 7am          | 9am       | 11am      | 1pm         | 3pm            | 5pm        | 7pm          | 9pm         | 11pm        | 1am         | 3am         | 5am          | 7am          | 9am       | 11am           | 1pm         | 3pm       |  |  |  |  |  |  |  |  |
| Mitotic low/high                   | Mitotic high |           |           | Mitotic low |           |            | Mitotic high |             |             | Mitotic low |             |              | Mitotic high |           |           | Mitotic low |                |            | Mitotic high |             |             | Mitotic low |             |              | Mitotic high |           |                | Mitotic low |           |  |  |  |  |  |  |  |  |
| 36hr Edu pulse chase: mitotic low  |              |           |           | Give Edu    | Give Edu  |            |              |             |             |             |             |              |              |           |           |             | Collect tissue |            |              |             |             |             |             |              |              |           |                |             |           |  |  |  |  |  |  |  |  |
| 36hr Edu pulse chase: mitotic high |              |           |           |             |           |            |              |             |             |             | Give Edu    | Give Edu     |              |           |           |             |                |            |              |             |             |             |             |              |              |           | Collect tissue |             |           |  |  |  |  |  |  |  |  |

**Fig. S6.** Design of the 36-h 5-ethynyl-2'-deoxyuridine (Edu) pulse-chase experiment. Experimental time points are identified in terms of the CT (Top), subjective day and night time of the day (Middle), and corresponding objective AM/PM time (Bottom). Twelve-hour-long periods of high and low mitotic activity in anagen hair-follicle matrix are marked as interchanging red and green timeline. Yellow and blue lines mark boundaries of the 36-h long Edu pulse-chase experiments that encompass either two 12-h-long mitotic depressions and one 12-h-long mitotic peak (yellow; CT54 groups) or for two mitotic peaks and one mitotic depression (green; CT66 group).







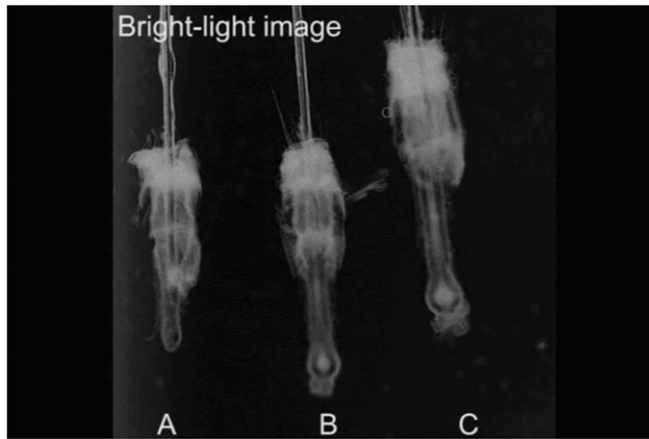

**Movie S1.** Per2Luc luminescence images of a telogen and two anagen vibrissa follicles.

[Movie S1](#)

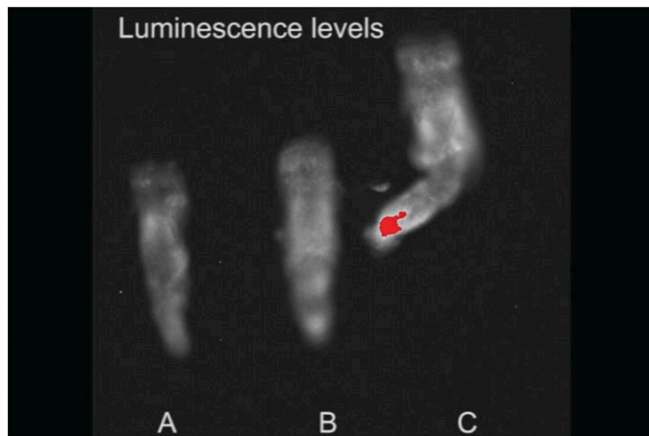

**Movie S2.** False-color rendering of Per2Luc luminescence images of vibrissa follicles shown in [Movie S1](#).

[Movie S2](#)

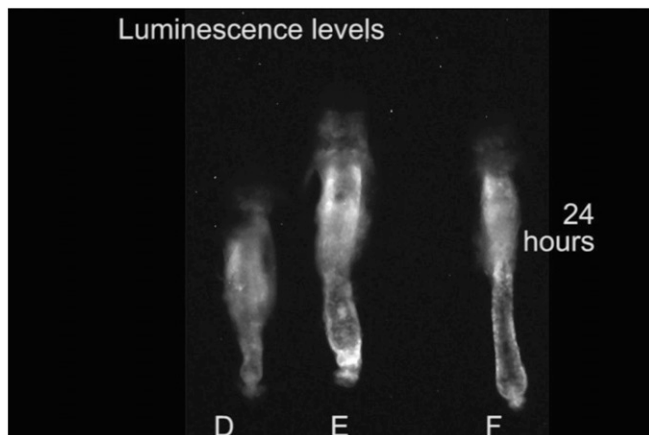

**Movie S3.** Per2Luc luminescence images of a telogen and two anagen vibrissa follicles. This is an independent experiment.

[Movie S3](#)

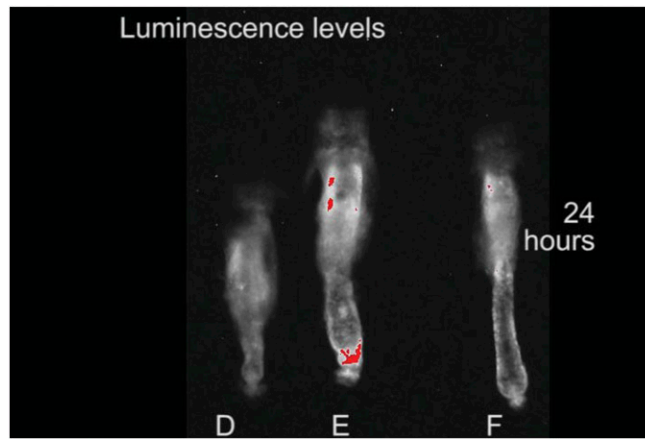

**Movie S4.** False-color rendering of Per2Luc luminescence images of vibrissa follicles shown in [Movie S3](#).

[Movie S4](#)
